# Supplementary material
Source: Springer Nature journal article supplement (https://www.springermedizin.de/resource/supplementary/12883_2012_590_MOESM5_ESM.pdf/9455772)

| Study             | Early Seizure Incidence |        | Odds Ratio (95 CI%)    |
|-------------------|-------------------------|--------|------------------------|
|                   | PHY                     | LEV    |                        |
| Jones 2008        | 0/41                    | 1/32   | 0.253 (0.010 - 6.421)  |
| Milligan 2008     | 9/210                   | 1/105  | 4.657 (0.582 – 37.256) |
| Szaflarski 2010   | 3/18                    | 5/34   | 1.160 (0.243 - 5.527)  |
| Murphy-Human 2011 | 4/297                   | 4/145  | 0.481 (0.119 – 1.952)  |
| POOLED            | 16/566                  | 11/316 | 0.962 (0.336 – 2.756)  |

(I-squared = 22.2 % p = 0.278)

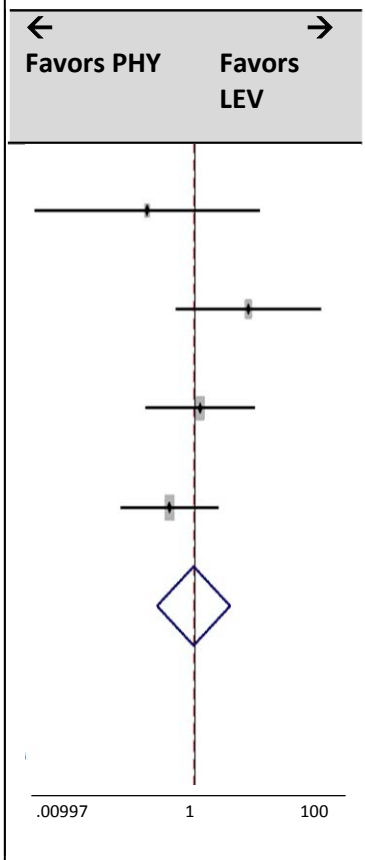

| Study             | Early Seizure Incidence |        | Odds Ratio (95 CI%)    |
|-------------------|-------------------------|--------|------------------------|
|                   | PHY                     | LEV    |                        |
| Jones 2008        | 0/41                    | 1/32   | 0.253 (0.010 - 6.421)  |
| Milligan 2008     | 9/210                   | 1/105  | 4.657 (0.582 – 37.256) |
| Szaflarski 2010   | 3/18                    | 5/34   | 1.160 (0.243 - 5.527)  |
| Murphy-Human 2011 | 4/297                   | 4/145  | 0.481 (0.119 – 1.952)  |
| POOLED            | 16/566                  | 11/316 | 0.962 (0.336 – 2.756)  |

(I-squared = 22.2 % p = 0.278)



Supplement: MOESM5 [file 9455772]
